# Supplementary material for: In situ earthworm breeding in orchards significantly improves the growth, quality and yield of papaya (Carica papaya L.)
Source: PeerJ. 2016 Dec 15;4:e2752. doi: 10.7717/peerj.2752 (PMC5162396; doi:10.7717/peerj.2752)
Supplement: Data S1 [file peerj-04-2752-s001.xlsx]

## Sheet: Sheet1
1. Plant growth		Plant Height	Treatments					Stem diameter
			C（control）	O（compost）	F(fertilizer)	E(in stu breeding earthworm)			C	O	F	E
		2016-04-15	30.5	30.2	30.4	30.5		2016-04-15	1.03	1.04	1.04	1.03
		2016-05-23	49.9	48.4	48.1	53.4		2016-05-23	2.32	2.15	2.03	2.39
		2016-06-10	79.9	81.3	84.9	92.5		2016-06-10	4.07	3.97	4.31	4.39
		2016-07-03	109	114.3	129.1	133.9		2016-07-03	6.13	6.3	7.17	7.2
		2016-07-21	135.1	143.4	158.4	167		2016-07-21	7.06	8.08	8.47	9.36
		2016-08-24	156.92	172.58	188.67	195.68		2016-08-24	9.02	10.34	12.71	13.13
2. Fruit quality
Treatments	Total soluble solid	Sugar	Treatments	Vc	Protein		Treatments	Total acid	Electrical conductivity			Firmness
C	10.8	6.14823	C	105.38	1.98551		C	3.4438	0.44		C	0.6
	11	5.79167		110.26	1.96385			4.355	0.46			0.9
	10.5	6.76718		118.75	2.08208			3.93513	0.48			0.86
	11.2	6.23569	O	128.57	1.95786		O	3.9262	0.25			0.85
O	11.9	7.50183		115.28	2.02589			4.04233	0.37		O	1.33
	12	6.81319		120.69	2.20556			3.97533	0.32			1.45
	11.5	6.26829	F	130.21	2.20513		F	4.422	0.4			1.5
	11.8	6.8611		126.88	2.25949			4.39967	0.41			1.5
F	12.3	9.02744		118.45	2.15036			4.6096	0.4		F	0.5
	12.4	7.74924	E	138.77	2.34581		E	2.5192	0.36			0.5
	12.5	6.43551		130.26	2.46624			3.17357	0.34			0.56
	12.2	7.73739		129.82	2.5481			2.43433	0.29			0.61
E	14.5	8.10473									E	0.94
	14.2	8.19442										0.94
	12.5	8.23432										0.95
	13	8.17782										0.8
3.yield		Treatments	Individual papaya weight	No. of fruits/ plant	Total fruit yield
		C	226.9	21.6667	5296.87
			241.995	17.6667	4606.32
			256.85	16.6667	4612.34
		O	331.57	21.3333	7621.26
			291.77	23.6667	7439.96
			275.075	19.3333	5729.95
		F	392.75	24.3333	10297
			348.305	27.6667	10382.7
			379.39	26.3333	10764.3
		E	386.245	25.3333	10542.6
			314.255	26.6667	9029.09
			377.005	30.6667	12456.8
4. The results of Statistical Analysis
		Total soluble solid			Sugar			Vc			Protein
	Treatments	Mean	SE		Mean	SE		Mean	SE		Mean	SE
	C	10.88	0.15	c	6.24	0.2	b	111.46	3.91	b	2.01	0.04	c
	O	11.8	0.11	b	6.86	0.25	b	121.51	3.86	ab	2.06	0.07	bc
	F	11.35	0.06	b	7.74	0.53	ab	125.18	3.5	a	2.21	0.03	b
	E	13.55	0.48	a	8.18	0.03	a	132.95	2.91	a	2.45	0.06	a
		Total acid			Electrical conductivity			Firmness
	Treatments	Mean	SE		Mean	SE		Mean	SE
	C	3.91	0.27	a	0.46	0.01	a	0.8	0.07	b
	O	3.98	0.03	a	0.31	0.03	b	1.45	0.04	a
	F	4.48	0.07	a	0.4	0	a	0.54	0.03	c
	E	2.71	0.23	b	0.33	0.02	b	0.91	0.04	b
		Individual papaya weight			No. of fruits/ plant			Total fruit yield
	Treatments	Mean	SE		Mean	SE		Mean	SE
	C	241.92	8.65	c	18.67	1.53	b	4838.51	229.19	c
	O	299.47	16.76	b	21.44	1.25	b	6930.39	602.5	b
	F	373.48	13.17	a	26.11	0.97	a	10481.3	143.63	a
	E	359.17	22.61	a	27.56	1.6	a	10676.2	991.75	a
